# Supplementary material
Source: publisher site journal article supplement (https://www.dovepress.com/article/567929)
Supplement: Supplementary file 1 [file Supplemetary%20Tables.docx]

**Suppementary Table S1. Baseline features of the study population before adjustment, after propensity score matching, and after inverse probability of treatment weighting.**

| **Variables** | **Unadjusted** | | | **PSM** | | | **IPTW** | | |
| --- | --- | --- | --- | --- | --- | --- | --- | --- | --- |
| **Pre-operative anemia** | | **P-value** | **Pre-operative anemia** | | **P-value** | **Pre-operative anemia** | | **P-value** |
| **Absence (n=453)** | **Presence (n=316)** | **Absence (n=197)** | **Presence (n=197)** | **Absence (n=453)** | **Presence (n=316)** |
| **Demographics** |  |  |  |  |  |  |  |  |  |
| Age, years | 61.0 (49.0-72.0) | 75.0 (63.8-84.0) | <0.001 | 69.0 (60.0-80.0) | 69.0 (59.0-79.0) | 0.865 | 66.0 (53.0-79.0) | 67.0 (56.0-78.0) | 0.480 |
| Male, n (%) | 228 (50.3) | 104 (32.9) | <0.001 | 127 (64.5) | 120 (60.9) | 0.532 | 245 (57.2) | 189 (60.3) | 0.469 |
| BMI, kg.m-2 | 23.0 ± 3.4 | 21.6 ± 3.6 | <0.001 | 22.2 ± 3.2 | 22.5 ± 3.5 | 0.330 | 22.4 (20.2-24.8) | 22.2 (20.0-25.0) | 0.826 |
| Surgical diagnosis, n (%) |  |  | <0.001 |  |  | 0.565 |  |  | 0.715 |
| - Avascular necrosis | 259 (57.2) | 81 (25.6) |  | 70 (35.5) | 76 (38.6) |  | 197 (46.0) | 134 (42.7) |  |
| - Femoral neck fracture | 123 (27.2) | 116 (36.7) |  | 78 (39.6) | 72 (36.5) |  | 138 (32.1) | 103 (33.0) |  |
| - Intertrochanteric fracture | 27 (6.0) | 100 (31.6) |  | 27 (13.7) | 33 (16.8) |  | 58 (13.6) | 53 (16.8) |  |
| - Osteoarthritis | 44 (9.7) | 19 (6.0) |  | 22 (11.2) | 16 (8.1) |  | 35 (8.2) | 23 (7.4) |  |
| **Comorbidities** |  |  |  |  |  |  |  |  |  |
| Smoking, n (%) | 54 (11.9) | 14 (4.4) | <0.001 | 10 (5.1) | 13 (6.6) | 0.667 | 40 (9.4) | 22 (7.1) | 0.364 |
| Ancohol use, n (%) | 38 (8.4) | 10 (3.2) | 0.005 | 10 (5.1) | 9 (4.6) | 1.000 | 29 (6.8) | 19 (6.1) | 0.776 |
| Hypertension, n (%) | 277 (61.1) | 248 (78.5) | <0.001 | 133 (67.5) | 140 (71.1) | 0.512 | 287 (67.0) | 214 (68.4) | 0.747 |
| CVD, n (%) | 86 (19.0) | 110 (34.8) | <0.001 | 47 (23.9) | 52 (26.4) | 0.642 | 102 (23.8) | 83 (26.4) | 0.473 |
| CKD, n (%) | 16 (3.5) | 65 (20.6) | <0.001 | 15 (7.6) | 13 (6.6) | 0.845 | 31 (7.2) | 33 (10.5) | 0.208 |
| Pulmonary TB, n (%) | 18 (4.0) | 21 (6.6) | 0.135 | 8 (4.1) | 10 (5.1) | 0.809 | 23 (5.3) | 15 (4.9) | 0.796 |
| COPD, n (%) | 5 (1.1) | 11 (3.5) | 0.044 | 4 (2.0) | 6 (3.0) | 0.751 | 7 (1.5) | 6 (2.0) | 0.632 |
| Asthma, n (%) | 9 (2.0) | 15 (4.7) | 0.051 | 4 (2.0) | 10 (5.1) | 0.172 | 10 (2.2) | 9 (2.9) | 0.582 |
| Diabetes, n (%) | 112 (24.7) | 115 (36.4) | <0.001 | 67 (34.0) | 67 (34.0) | 1.000 | 123 (28.8) | 93 (29.6) | 0.831 |
| Dyslipidemia, n (%) | 146 (32.2) | 99 (31.3) | 0.853 | 62 (31.5) | 65 (33.0) | 0.829 | 142 (33.1) | 106 (33.7) | 0.876 |
| Heart failure, n (%) | 15 (3.3) | 26 (8.2) | 0.005 | 8 (4.1) | 11 (5.6) | 0.638 | 20 (4.6) | 17 (5.4) | 0.673 |
| Cushing syndrome, n (%) | 48 (10.6) | 35 (11.1) | 0.926 | 25 (12.7) | 21 (10.7) | 0.638 | 47 (10.9) | 35 (11.1) | 0.948 |
| Stroke sequelae, n (%) | 34 (7.5) | 30 (9.5) | 0.396 | 18 (9.1) | 19 (9.6) | 1.000 | 35 (8.3) | 25 (7.9) | 0.866 |
| Atrial fibrillation, n (%) | 2 (0.4) | 13 (4.1) | <0.001 | 2 (1.0) | 5 (2.5) | 0.449 | 5 (1.2) | 6 (2.0) | 0.467 |
| Hepatitis, n (%) | 27 (6.0) | 18 (5.7) | 1.000 | 12 (6.1) | 13 (6.6) | 1.000 | 26 (6.1) | 19 (6.1) | 0.965 |
| Thyroid disease, n (%) | 15 (3.3) | 19 (6.0) | 0.106 | 11 (5.6) | 11 (5.6) | 1.000 | 18 (4.1) | 13 (4.2) | 0.963 |
| Cancer, n (%) | 18 (4.0) | 21 (6.6) | 0.135 | 12 (6.1) | 11 (5.6) | 1.000 | 20 (4.6) | 16 (5.0) | 0.806 |
| Peptic ulcer, n (%) | 17 (3.8) | 18 (5.7) | 0.273 | 10 (5.1) | 9 (4.6) | 1.000 | 20 (4.6) | 17 (5.6) | 0.645 |
| Dementia, n (%) | 6 (1.3) | 18 (5.7) | 0.001 | 5 (2.5) | 4 (2.0) | 1.000 | 11 (2.6) | 10 (3.2) | 0.697 |
| Cirrhosis, n (%) | 5 (1.1) | 8 (2.5) | 0.220 | 2 (1.0) | 5 (2.5) | 0.449 | 5 (1.1) | 6 (2.0) | 0.251 |
| Osteoporosis, n (%) | 20 (4.4) | 24 (7.6) | 0.087 | 11 (5.6) | 14 (7.1) | 0.679 | 25 (5.8) | 22 (7.0) | 0.596 |
| CTD, n (%) | 9 (2.0) | 8 (2.5) | 0.798 | 1 (0.5) | 7 (3.6) | 0.068 | 6 (1.5) | 9 (2.8) | 0.206 |
| Charlson comorbidity index | 2.0 (1.0-4.0) | 4.0 (3.0-5.0) | <0.001 | 3.0 (2.0-4.0) | 3.0 (2.0-4.0) | 0.773 | 3.0 (1.0-4.0) | 3.0 (1.0-4.0) | 0.384 |
| Physical status, n (%) |  |  | <0.001 |  |  | 0.859 |  |  | 0.726 |
| - ASA-I | 117 (25.8) | 47 (14.9) |  | 43 (21.8) | 41 (20.8) |  | 95 (22.2) | 70 (22.4) |  |
| - ASA-II | 238 (52.5) | 137 (43.4) |  | 97 (49.2) | 94 (47.7) |  | 213 (49.6) | 145 (46.5) |  |
| - ASA-III | 98 (21.6) | 132 (41.8) |  | 57 (28.9) | 62 (31.5) |  | 121 (28.2) | 97 (31.1) |  |
| **Laboratory features** |  |  |  |  |  |  |  |  |  |
| WBC, G.L-1 | 8.9 (7.1-10.8) | 9.0 (7.0-11.4) | 0.615 | 8.9 (7.2-11.3) | 8.7 (7.0-10.5) | 0.278 | 9.2 (7.2-11.5) | 8.8 (7.1-11.2) | 0.217 |
| RBC, T.L-1 | 4.6 (4.3-5.0) | 3.8 (3.4-4.1) | <0.001 | 4.4 (4.2-4.8) | 3.9 (3.5-4.2) | <0.001 | 4.5 (4.2-4.9) | 3.9 (3.5-4.2) | <0.001 |
| Hb, g.dL-1 | 13.8 (13.0-14.6) | 11.0 (10.1-11.7) | <0.001 | 13.3 (12.7-14.3) | 11.2 (10.3-11.8) | <0.001 | 13.6 (12.8-14.5) | 11.3 (10.4-11.9) | <0.001 |
| PLT, G.L-1 | 269 (225-320) | 264 (201-362) | 0.791 | 268 (220-315) | 272 (204-385) | 0.107 | 264 (221-316) | 284 (213-382) | 0.016 |
| Glucose, mmol.L-1 | 5.5 (4.8-6.8) | 6.1 (5.1-8.3) | <0.001 | 5.7 (4.9-7.2) | 5.8 (5.0-7.6) | 0.713 | 5.7 (4.8-7.4) | 5.8 (5.0-7.4) | 0.723 |
| CRP, mg.L-1 | 9.3 (3.4-36.7) | 24.3 (8.6-56.6) | <0.001 | 16.2 (4.4-51.7) | 19.8 (7.1-45.6) | 0.419 | 13.7 (4.1-42.4) | 16.4 (5.0-45.6) | 0.373 |
| Ejection fraction, % | 67.4 ± 8.4 | 67.1 ± 8.8 | 0.706 | 66.2 ± 8.5 | 67.7 ± 8.5 | 0.124 | 67.0 (61.0-73.0) | 67.0 (62.0-73.0) | 0.335 |
| INR, ratio | 1 (0.9-1.0) | 1 (1.0-1.1) | <0.001 | 1.0 (0.9-1.1) | 1.0 (1.0-1.1) | 0.003 | 1.0 (0.9-1.0) | 1.0 (1.0-1.1) | <0.001 |
| Fibrinogen, g.L-1 | 4.0 (3.3-4.7) | 4.5 (3.5-5.6) | <0.001 | 4.1 (3.3-4.9) | 4.4 (3.5-5.3) | 0.051 | 4.0 (3.3-4.9) | 4.4 (3.4-5.4) | 0.026 |
| Urea, mmol.L-1 | 4.7 (3.7-5.9) | 5.5 (4.1-6.9) | <0.001 | 4.8 (3.8-6.1) | 5.0 (3.8-6.4) | 0.387 | 4.9 (3.8-6.2) | 4.9 (3.7-6.4) | 0.359 |
| Creatinine, mg.dL-1 | 0.8 (0.6-0.9) | 0.8 (0.6-0.9) | 0.309 | 0.7 (0.6-0.9) | 0.8 (0.6-0.9) | 0.467 | 0.8 (0.6-0.9) | 0.8 (0.7-0.9) | 0.285 |
| eGFR, mL.min-1 | 93.5 ± 21.1 | 81.1 ± 26.9 | <0.001 | 89 (73-101) | 87 (73-104) | 0.544 | 90 (76-103) | 86 (73-102) | 0.037 |
| AST, IU.L-1 | 27 (21.0-34.5) | 26 (20.0-34.0) | 0.305 | 25.0 (20.0-34.0) | 26.0 (20.5-33.5) | 0.948 | 27.0 (21.0-35.0) | 26.0 (20.0-34.0) | 0.225 |
| ALT, IU.L-1 | 24 (16.0-37.0) | 17.7 (12.0-26.0) | <0.001 | 21.0 (15.0-30.0) | 19.0 (13.0-26.0) | 0.253 | 22.0 (16.0-34.0) | 19.3 (13.0-31.0) | 0.017 |
| HbA1c, % | 6.8 (6.0-8.7) | 6.8 (5.9-8.6) | 0.656 | 7.1 (6.0-8.7) | 6.5 (5.9-8.1) | 0.167 | 6.8 (5.9-8.5) | 6.8 (5.9-8.3) | 0.999 |
| Sodium, mmol.L-1 | 140 (138-142) | 138 (136-141) | <0.001 | 140 (138-142) | 139 (137-141) | 0.028 | 140 (138-142) | 139 (137-142) | 0.107 |
| Potassium, mmol.L-1 | 3.8 (3.5-4.0) | 3.8 (3.5-4.2) | 0.062 | 3.8 (3.5-4.0) | 3.8 (3.5-4.0) | 0.658 | 3.8 (3.5-4.0) | 3.8 (3.5-4.0) | 0.816 |
| Chloride, mmol.L-1 | 104 (102-106) | 104 (101-107) | 0.141 | 104 (102-106) | 104 (101-107) | 0.886 | 104 (102-106) | 104 (101-107) | 0.640 |

*Abbreviations: ASA, American Society of Anesthesiologists; AST, aspartate aminotransferase; ALT, alanine aminotransferase; BMI, body mass index; CKD, chronic kidney disease; COPD, chronic obstructive pulmonary disease; CRP, C-reactive protein; CVD, cardiovascular disease; CTD, Connective tissue disease; eGFR, estimated glomerular filtration rate; Hb, hemoglobin; HbA1c, hemoglobin A1C; Hct, hematocrit; INR, international normalized ratio; IPTW, inverse Probability of Treatment Weighting****;*** *NRS, Nutritional Risk Screening; PLT, platelet count; ; PSM: propensity score matching; RBC, red blood cell count; TB, tuberculosis; WBC, white blood cell count.*

**Suppementary Table S2. Intervention and treatment comparisons before adjustment, after propensity score matching, and after inverse probability of treatment weighting.**

| **Variables** | **Unadjusted** | | | **PSM** | | | **IPTW** | | |
| --- | --- | --- | --- | --- | --- | --- | --- | --- | --- |
| **Pre-operative anemia** | | **P-value** | **Pre-operative anemia** | | **P-value** | **Pre-operative anemia** | | **P-value** |
| **Absence (n=453)** | **Presence (n=316)** | **Absence (n=197)** | **Presence (n=197)** | **Absence (n=453)** | **Presence (n=316)** |
| **Pre-operative stage** |  |  |  |  |  |  |  |  |  |
| ERAS intervention, n (%) | 235 (51.9) | 121 (38.3) | <0.001 | 102 (51.8) | 105 (53.3) | 0.840 | 221 (51.6) | 163 (52.1) | 0.942 |
| Prophylactic antibiotics, n (%) | 450 (99.3) | 303 (95.9) | 0.001 | 196 (99.5) | 192(97.5) | 0.215 | 426 (99.3) | 304 (97.2) | 0.016 |
| Pre-operative LOS, days | 1.2 (1.0-1.4) | 1.4 (1.1-2.8) | <0.001 | 1.2 (1.0-1.6) | 1.3 (1.0-2.4) | 0.058 | 1.2 (1.0-1.6) | 1.3 (1.0-2.3) | 0.051 |
| **Intra-operative stage** |  |  |  |  |  |  |  |  |  |
| Surgery time, minutes | 80 (65-90) | 75 (60-90) | 0.097 | 74 (60-86) | 80.0 (65-95) | 0.014 | 75 (63-90) | 80 (65-95) | 0.129 |
| Right hip arthroplasty, n (%) | 219 (48.3) | 145 (45.9) | 0.550 | 104 (52.8) | 101 (51.3) | 0.840 | 216 (50.4) | 164 (52.4) | 0.646 |
| Total hip arthroplasty, n (%) | 356 (78.6) | 171 (54.1) | <0.001 | 130 (66.0) | 129 (65.5) |  | 301 (70.3) | 210 (67.2) |  |
| Primary hip arthroplasty, n (%) | 427 (94.3) | 297 (94.0) | 0.998 | 184 (93.4) | 185 (93.9) | 1.000 | 401 (93.6) | 294 (94.1) | 0.801 |
| Anesthesia time, minutes | 130 (110-145) | 127 (110-149) | 0.812 | 124 (105-140) | 129 (110-150) | 0.030 | 125 (110-145) | 127 (110-150) | 0.143 |
| General anesthesia, n (%) | 392 (86.5) | 291 (92.1) | 0.022 | 173 (87.8) | 178 (90.4) | 0.518 | 378 (88.2) | 284 (90.9) | 0.342 |
| Regional analgesia, n (%) | 210 (46.4) | 137 (43.4) | 0.453 | 90 (45.7) | 83 (42.1) | 0.542 | 200 (46.6) | 130 (41.5) | 0.239 |
| Ephedrine use, n (%) | 139 (30.7) | 132 (41.8) | 0.002 | 70 (35.5) | 76 (38.6) | 0.602 | 144 (33.6) | 117 (37.4) | 0.348 |
| Epinephrine use, n (%) | 2 (0.4) | 1 (0.3) | 1.000 | 0 (0.0) | 1 (0.5) | 1.000 | 2 (0.4) | 1 (0.4) | 0.898 |
| Phenylephrine use, n (%) | 34 (7.5) | 46 (14.6) | 0.002 | 19 (9.6) | 24 (12.2) | 0.518 | 39 (9.1) | 36 (11.4) | 0.367 |
| Noradrenalin use, n (%) | 10 (2.2) | 26 (8.2) | <0.001 | 5 (2.5) | 10 (5.1) | 0.292 | 15 (3.5) | 17 (5.5) | 0.289 |
| Nicardipine use, n (%) | 26 (5.7) | 21 (6.6) | 0.717 | 8 (4.1) | 14 (7.1) | 0.273 | 23 (5.3) | 22 (7.0) | 0.405 |
| Tranexamic acid use, n (%) | 159 (35.1) | 90 (28.5) | 0.064 | 63 (32.0) | 64 (32.5) | 1.000 | 139 (32.4) | 107 (34.1) | 0.675 |
| Acetaminophen use, n (%) | 371 (81.9) | 277 (87.7) | 0.040 | 162 (82.2) | 168 (85.3) | 0.495 | 357 (83.3) | 267 (85.3) | 0.544 |
| NSAID use, n (%) | 84 (18.5) | 24 (7.6) | <0.001 | 29 (14.7) | 21 (10.7) | 0.289 | 72 (16.8) | 29 (9.4) | 0.019 |
| Nefopam use, n (%) | 274 (60.5) | 201 (63.6) | 0.423 | 123 (62.4) | 128 (65.0) | 0.675 | 263 (61.3) | 204 (65.0) | 0.375 |
| Tramadol use, n (%) | 176 (38.9) | 131 (41.5) | 0.515 | 73 (37.1) | 83 (42.1) | 0.354 | 169 (39.5) | 128 (41.0) | 0.729 |
| Morphine use, n (%) | 13 (2.9) | 13 (4.1) | 0.461 | 8 (4.1) | 7 (3.6) | 1.000 | 15 (3.5) | 14 (4.6) | 0.560 |
| Fluid balance, mL.kg-1 | 10.8 ± 7.6 | 10.5 ± 9.4 | 0.610 | 10.3 (6.0-15.0) | 9.3 (4.2-15.0) | 0.325 | 9.7 (5.7-15.0) | 9.3 (4.2-14.9) | 0.392 |
| NMBA use, n (%) |  |  | <0.001 |  |  | 0.832 |  |  | 0.587 |
| - None | 92 (20.3) | 48 (15.2) |  | 37 (18.8) | 35 (17.8) |  | 76 (17.7) | 53 (16.9) |  |
| - Neostigmine | 199 (43.9) | 83 (26.3) |  | 71 (36.0) | 67 (34.0) |  | 166 (38.7) | 110 (35.1) |  |
| - Sugammadex | 162 (35.8) | 185 (58.5) |  | 89 (45.2) | 95 (48.2) |  | 187 (43.6) | 150 (48.0) |  |
| **Post-operative stage** |  |  |  |  |  |  |  |  |  |
| Acetaminophen use, n (%) | 451 (99.6) | 313 (99.1) | 0.406 | 195 (99.0) | 196 (99.5) | 1.000 | 426 (99.2) | 311 (99.4) | 0.827 |
| Nefopam use, n (%) | 310 (68.4) | 224 (70.9) | 0.518 | 50 (25.4) | 37 (18.8) | 0.145 | 125 (29.2) | 60 (19.2) | 0.010 |
| NSAID use, n (%) | 310 (68.4) | 268 (84.8) | <0.001 | 132 (67.0) | 136 (69.0) | 0.746 | 296 (69.1) | 220 (70.3) | 0.757 |
| Pregabalin use, n (%) | 267 (58.9) | 192 (60.8) | 0.666 | 121 (61.4) | 128 (65.0) | 0.531 | 253 (59.0) | 207 (66.0) | 0.091 |
| Tramadol use, n (%) | 271 (59.8) | 174 (55.1) | 0.215 | 120 (60.9) | 113 (57.4) | 0.539 | 261 (60.9) | 180 (57.7) | 0.441 |
| Morphine use, n (%) | 106 (23.4) | 62 (19.6) | 0.246 | 43 (21.8) | 48 (24.4) | 0.633 | 96 (22.3) | 87 (27.8) | 0.161 |
| Enoxaparin use, n (%) | 450 (99.3) | 305 (96.5) | 0.005 | 196 (99.5) | 195 (99.0) | 1.000 | 426 (99.4) | 307 (98.1) | 0.078 |
| NOACs use, n (%) | 436 (96.2) | 289 (91.5) | 0.008 | 186 (94.4) | 184 (93.4) | 0.833 | 407 (94.8) | 291 (92.9) | 0.392 |
| Heparin use, n (%) | 3 (0.7) | 12 (3.8) | 0.003 | 3 (1.5) | 3 (1.5) | 1.000 | 7 (1.6) | 7 (2.1) | 0.715 |
| Aspirin use, n (%) | 34 (7.5) | 26 (8.2) | 0.817 | 17 (8.6) | 14 (7.1) | 0.708 | 34 (7.8) | 25 (7.9) | 0.977 |
| P2Y12 inhibitors use, n (%) | 35 (7.7) | 35 (11.1) | 0.144 | 19 (9.6) | 19 (9.6) | 1.000 | 40 (9.3) | 29 (9.3) | 0.987 |

*Abbreviations: IPTW, inverse probability of treatment weighting; ERAS, enhanced recovery after surgery; LOS: length of stay; NOACs, novel oral anticoagulants; NSAID, non-steroidal anti-inflammatory drugs; NMBA, neuromuscular blocking agent; PSM: propensity score matching*
